# Supplementary material for: Direct-S: a directed mass spectrometry method for biomarker verification in native serum
Source: Royal Society of Chemistry journal article supplement (doi:10.1039/c5an00165j), 2015-01-01
Supplement: c5an00165j1.pdf [file c5an00165j1.pdf]

Table S1. Transitions Used for MRM Analysis

| <b>Q1</b>  | <b>Q3</b>   | <b>name</b>                | <b>DP</b> | <b>CE</b> |
|------------|-------------|----------------------------|-----------|-----------|
| 426.750527 | 694.424636  | SASLHLPK.+2y6.light        | 62.2      | 20.2      |
| 426.750527 | 494.308544  | SASLHLPK.+2y4.light        | 62.2      | 24.2      |
| 426.750527 | 357.249632  | SASLHLPK.+2y3.light        | 62.2      | 25.2      |
| 426.750527 | 496.251423  | SASLHLPK.+2b5.light        | 62.2      | 24.2      |
| 426.750527 | 609.335487  | SASLHLPK.+2b6.light        | 62.2      | 21.2      |
| 601.991497 | 827.462144  | LQHLENELTHDIITK.+3y7.light | 75        | 31.3      |
| 601.991497 | 726.414465  | LQHLENELTHDIITK.+3y6.light | 75        | 31.3      |
| 601.991497 | 589.355553  | LQHLENELTHDIITK.+3y5.light | 75        | 35.3      |
| 601.991497 | 379.208829  | LQHLENELTHDIITK.+3b3.light | 75        | 34.3      |
| 601.991497 | 864.421007  | LQHLENELTHDIITK.+3b7.light | 75        | 30.3      |
| 796.899376 | 1134.590198 | ELSEALGQIFDSQR.+2y10.light | 89.2      | 41.5      |
| 796.899376 | 1063.553084 | ELSEALGQIFDSQR.+2y9.light  | 89.2      | 42.5      |
| 796.899376 | 950.46902   | ELSEALGQIFDSQR.+2y8.light  | 89.2      | 39.5      |
| 796.899376 | 765.388979  | ELSEALGQIFDSQR.+2y6.light  | 89.2      | 38.5      |
| 796.899376 | 652.304915  | ELSEALGQIFDSQR.+2y5.light  | 89.2      | 33.5      |
| 442.889379 | 674.371932  | ASHEEVEGLVEK.+3y6.light    | 63.4      | 19.7      |
| 442.889379 | 545.329339  | ASHEEVEGLVEK.+3y5.light    | 63.4      | 19.7      |
| 442.889379 | 488.307875  | ASHEEVEGLVEK.+3y4.light    | 63.4      | 20.7      |
| 442.889379 | 554.220516  | ASHEEVEGLVEK.+3b5.light    | 63.4      | 22.7      |
| 442.889379 | 653.28893   | ASHEEVEGLVEK.+3b6.light    | 63.4      | 19.7      |
| 410.719227 | 721.362764  | VGFAEAAR.+2y7.light        | 61.1      | 20.6      |
| 410.719227 | 664.3413    | VGFAEAAR.+2y6.light        | 61.1      | 19.6      |
| 410.719227 | 517.272886  | VGFAEAAR.+2y5.light        | 61.1      | 21.6      |
| 410.719227 | 446.235772  | VGFAEAAR.+2y4.light        | 61.1      | 22.6      |
| 410.719227 | 504.245275  | VGFAEAAR.+2b5.light        | 61.1      | 18.6      |

Table S2. The RSDs of the calibration mixtures for quantification

|                            | <b>100:1</b> | <b>10:1</b> | <b>5:1</b> | <b>2:1</b> | <b>1:1</b> | <b>1:2</b> | <b>1:5</b> | <b>1:10</b> |
|----------------------------|--------------|-------------|------------|------------|------------|------------|------------|-------------|
| <b>P<sub>AIAT-1</sub></b>  | —            | 4.0%        | 1.6%       | 1.6%       | 0.8%       | 0.2%       | 3.2%       | 2.4%        |
| <b>P<sub>AIAT-2</sub></b>  | 11.8%        | 4.2%        | 2.1%       | 7.4%       | 4.0%       | 0.5%       | 4.7%       | 10.9%       |
| <b>P<sub>LG3BP-1</sub></b> | —            | 10.0%       | 6.5%       | 1.3%       | 2.6%       | 6.4%       | 5.7%       | 8.8%        |
| <b>P<sub>LG3BP-2</sub></b> | 4.4%         | 3.2%        | 4.4%       | 13.8%      | 1.7%       | 5.2%       | 2.7%       | 9.5%        |
| <b>P<sub>CTSD</sub></b>    | 25.5%        | 8.6%        | 22.1%      | 1.3%       | 8.0%       | 3.6%       | 6.6%       | 3.3%        |

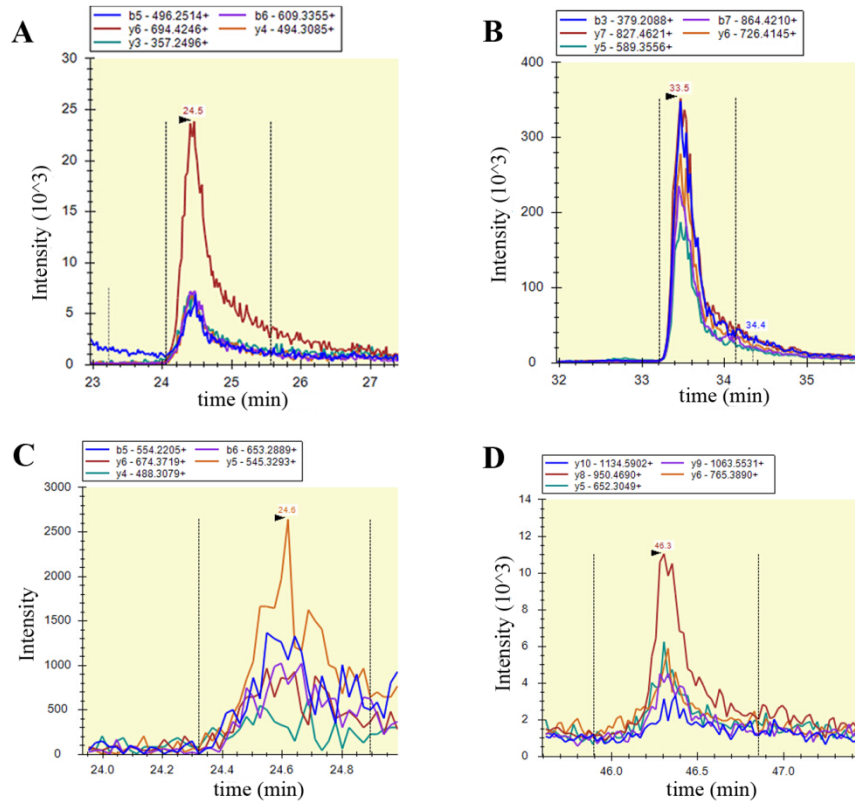

Figure S1. The MRM traces of target peptides of A1AT and LG3BP. A: SASLHLPK, B: LQHLENLTHDIITK, C: ASHEEVEGLVEK, D: ELSEALGQIFDSQR.

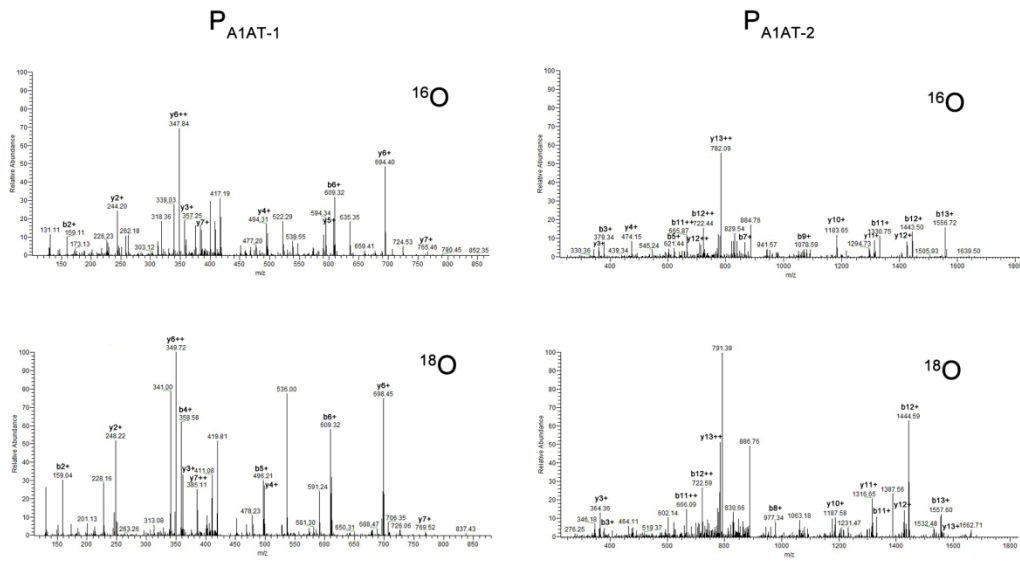

Figure S2. The MS/MS spectra of  $^{16}\text{O}$ -labeled and  $^{18}\text{O}$ -labeled peptides of A1AT. The MS/MS spectra of both  $^{16}\text{O}$ -labeled and  $^{18}\text{O}$ -labeled peptides showed high quality and could be successfully matched to theoretical spectra in database search.

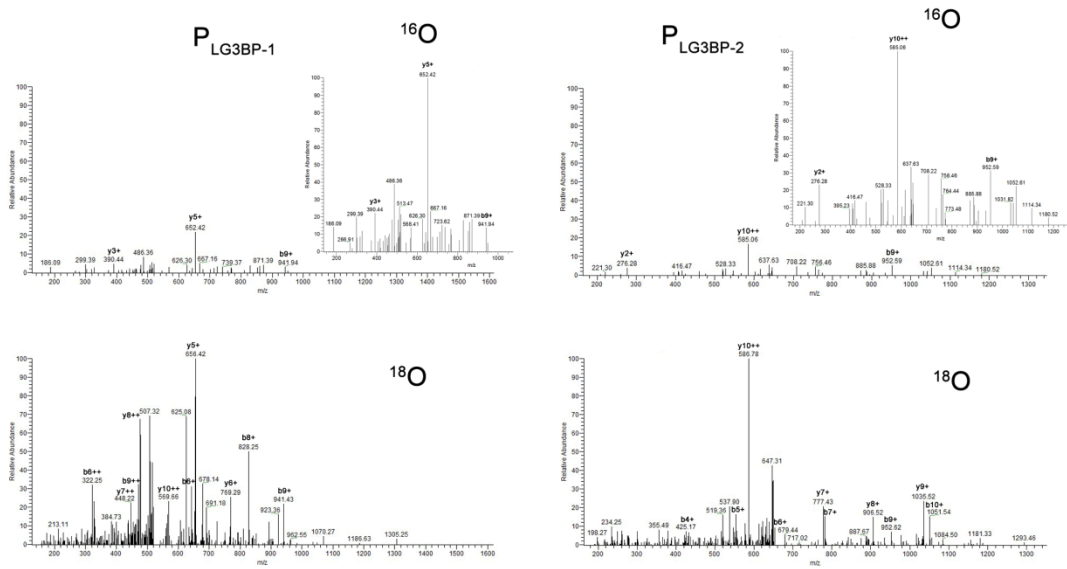

Figure S3. The MS/MS spectra of  $^{16}\text{O}$ -labeled and  $^{18}\text{O}$ -labeled peptides of LG3BP. Only the MS/MS spectra of  $^{18}\text{O}$ -labeled peptides could be successfully matched to theoretical spectra in database search. The MS/MS spectra of  $^{16}\text{O}$ -labeled peptides could not pass the threshold of database search. For comparison, MS/MS spectra of  $^{16}\text{O}$ -labeled were modified using the same absolute intensity with  $^{18}\text{O}$ -labeled, and their original spectra was shown in top right corner.

P<sub>CTSD</sub>

No <sup>16</sup>O MS2

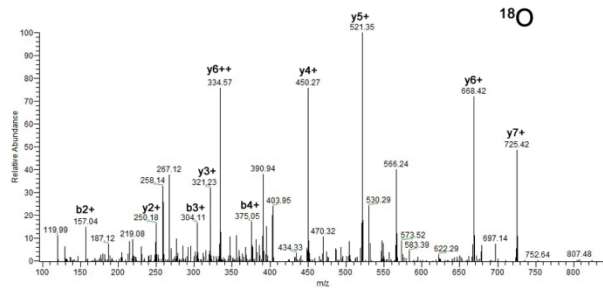

Figure S4. The MS/MS spectrum of <sup>18</sup>O-labeled peptide of CTSD. Only the MS/MS spectrum of <sup>18</sup>O-labeled peptide could be obtained and successfully matched to theoretical spectra in database search. The intensity of <sup>16</sup>O-labeled peak in MS was too low, which could not be selected for CID. Therefore, no MS/MS spectrum of <sup>16</sup>O-labeled peptide was obtained.

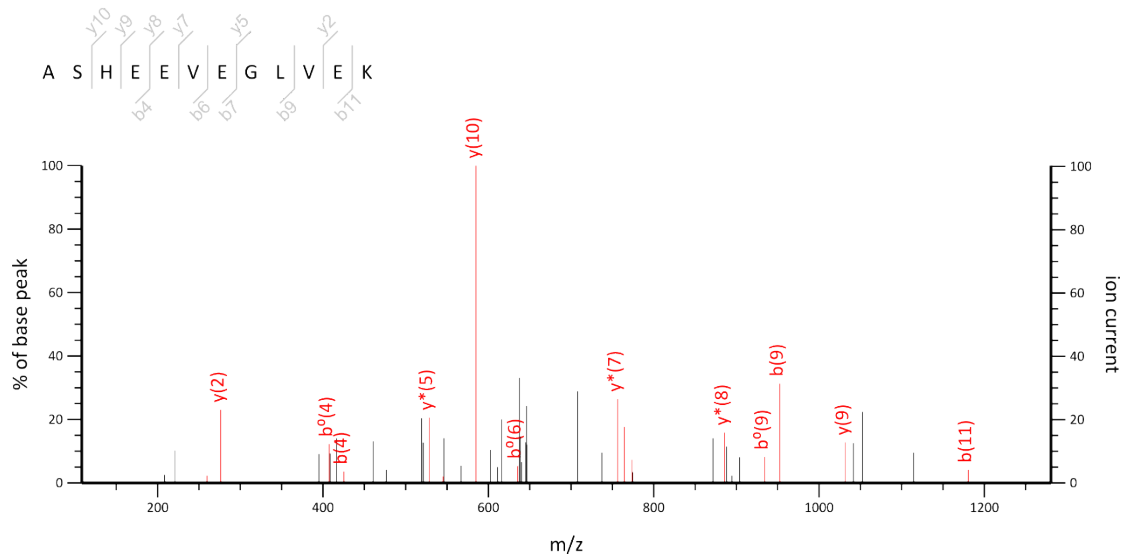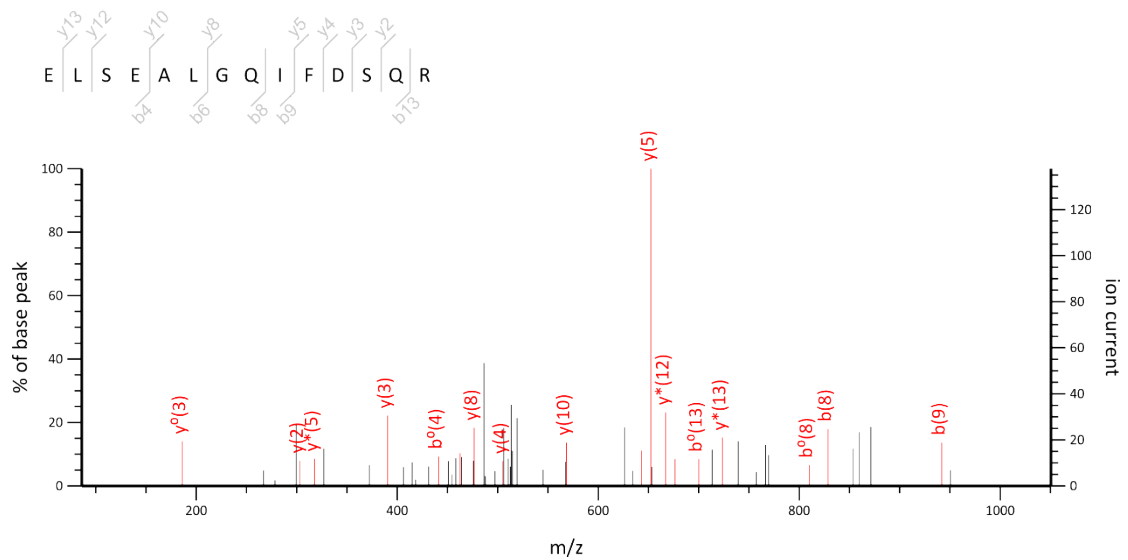

Figure S5. The assigned spectra including  $-H_2O$ ,  $-NH_3$  and  $+2H$  Peaks

$^{16}O$ -labeled and  $^{18}O$ -labeled of LG3BP peptides. The top-ranking peptides of the two unidentified spectra were assigned to corresponding  $^{16}O$  peptides of LG3BP, However, Peptide Prophet probability was less than 0.90.

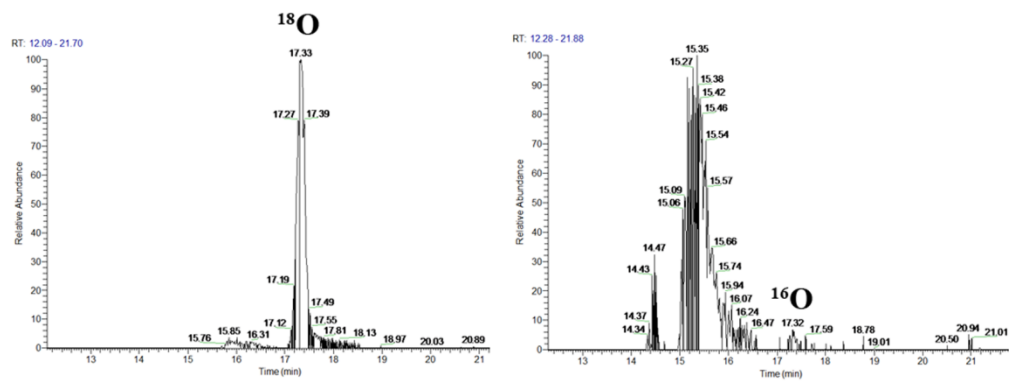

Figure S6. The extract ion chromatographs of  $^{18}\text{O}$ -labeled and native ( $^{16}\text{O}$ -labeled) peptides of CTSD.



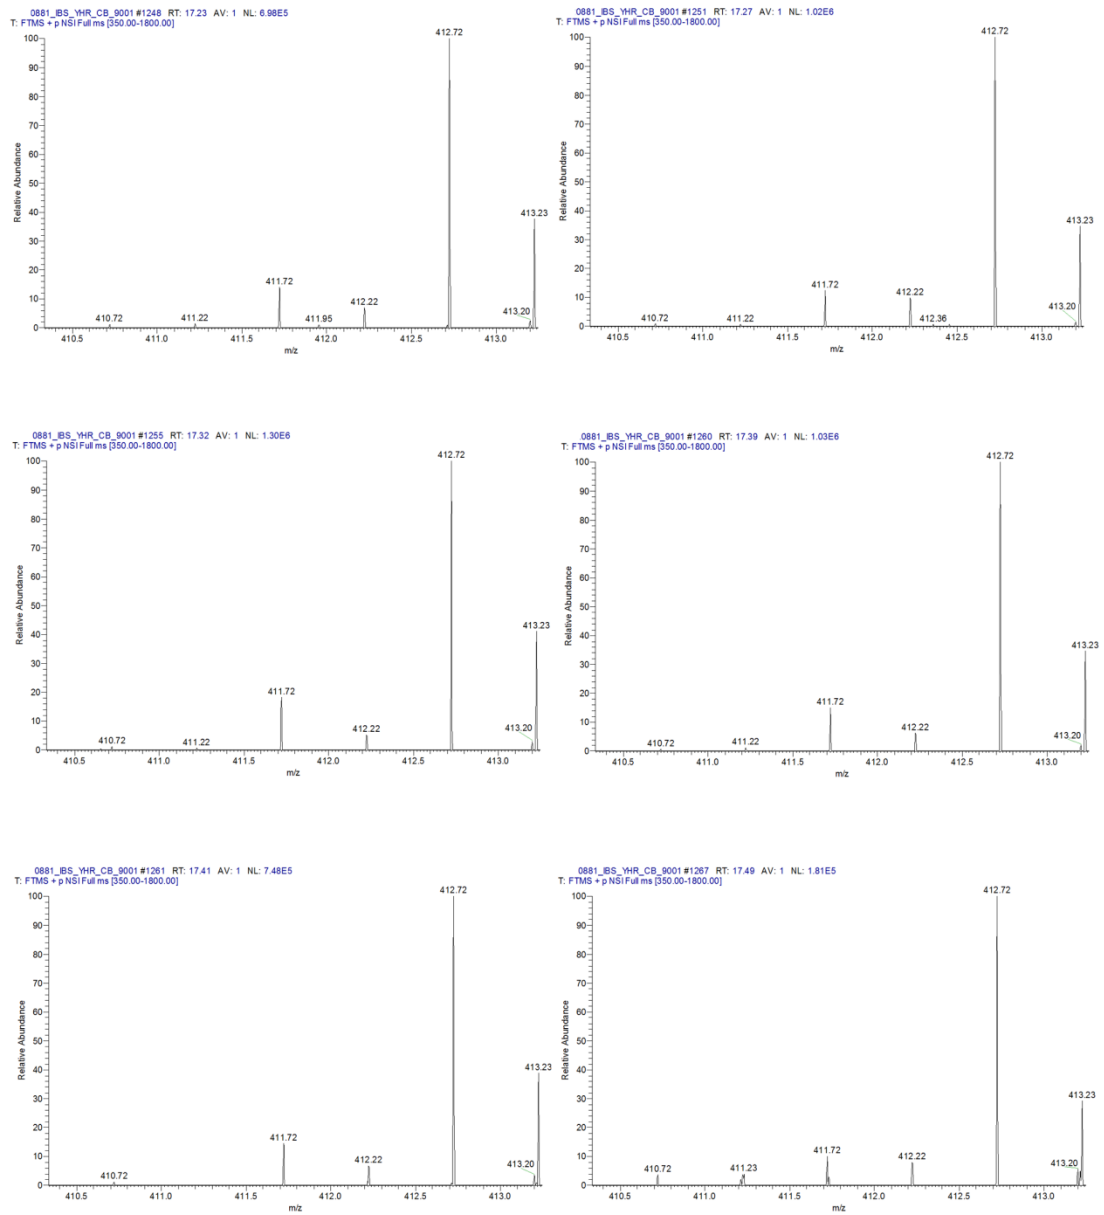

Figure S7. The MS1 scans of P<sub>CTSD</sub>. During the elution time, multiple consecutive MS1 scans were present.
